# Supplementary material
Source: PubMed Central journal article supplement (PMC4617747)
Supplement: NIHMS729772-supplement-01.pdf [file NIHMS729772-supplement-01.pdf]

**Supporting information for**

**Rapid Assessment of Human Amylin Aggregation  
and its Inhibition by Copper(II) Ions by Laser  
Ablation Electrospray Ionization Mass  
Spectrometry with Ion Mobility Separation**

Hang Li,<sup>1+</sup> Emmeline Ha,<sup>1+</sup> Robert P. Donaldson,<sup>2</sup> Aleksandar M. Jeremic<sup>2</sup> and Akos Vertes<sup>1\*</sup>

<sup>1</sup>Department of Chemistry, W. M. Keck Institute for Proteomics Technology and Applications, The George Washington University, Washington, DC 20052

<sup>2</sup>Department of Biological Sciences, The George Washington University, Washington, DC 20052

**\*Corresponding Author:** Tel.: +1 (202) 994-2717; fax: +1 (202) 994-5873. E-mail address: [vertes@gwu.edu](mailto:vertes@gwu.edu) (A. Vertes). Address: Department of Chemistry, The George Washington University, 800 22-nd Street, N.W., Washington, DC 20052, USA.

<sup>+</sup>These two authors contributed equally.

**Table of Contents**

**Supplementary Figures ..... S-2 to S-7**

**Supplementary Tables ..... S-8 to S-10**

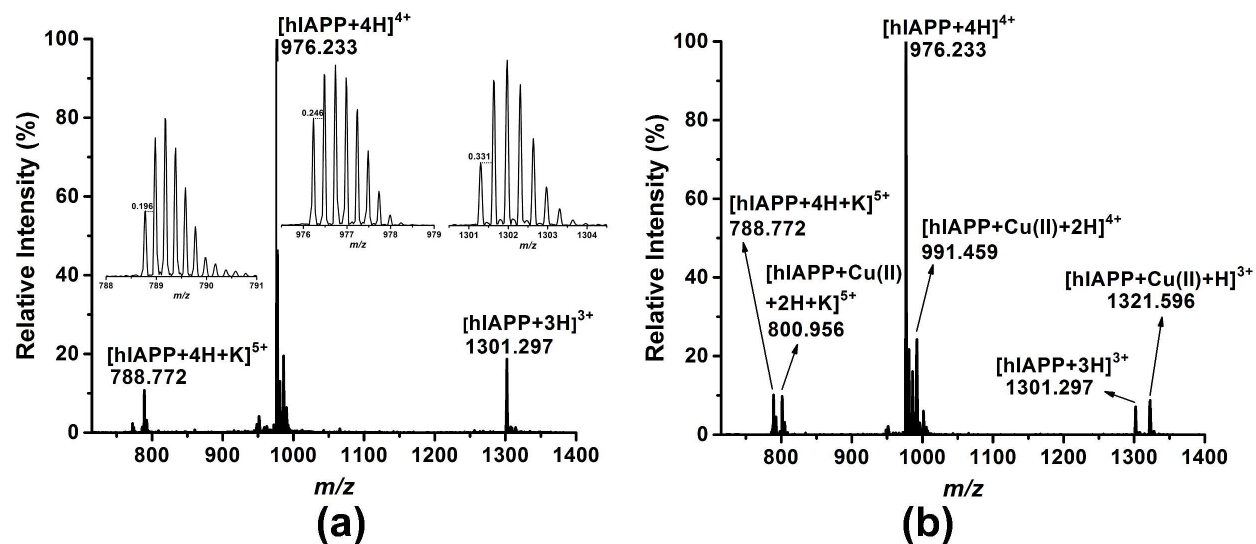

**Figure S1.** Mass spectra of (a) 20 μM hIAPP solution and (b) the copper adducts of hIAPP acquired by LAESI-IMS-MS. The copper adducts were produced by incubating the hIAPP solution with 40 μM CuCl<sub>2</sub> solution for 8 h. The insets in (a) show the isotope distribution patterns of the quintuply, quadruply, and triply charged hIAPP ions.

**(a) Synthesized hIAPP**

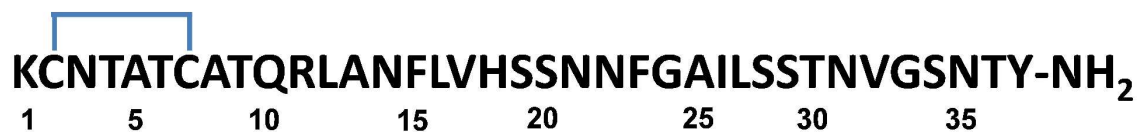

**(b) hIAPP<sub>H18A</sub>**

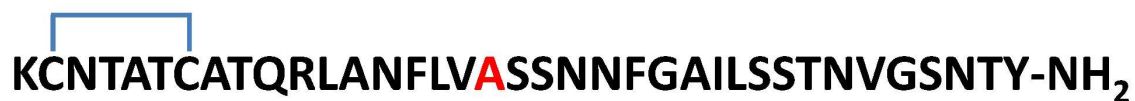

**(c) hIAPP<sub>8-37</sub>**

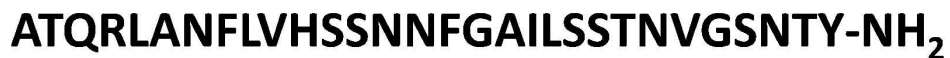

**Figure S2.** Amino acid sequence of (a) the synthetic human amylin (hIAPP), (b) amylin with residue 18, histidine, substituted by alanine (hIAPP<sub>H18A</sub>), and (c) hIAPP fragment 8-37 (hIAPP<sub>8-37</sub>).

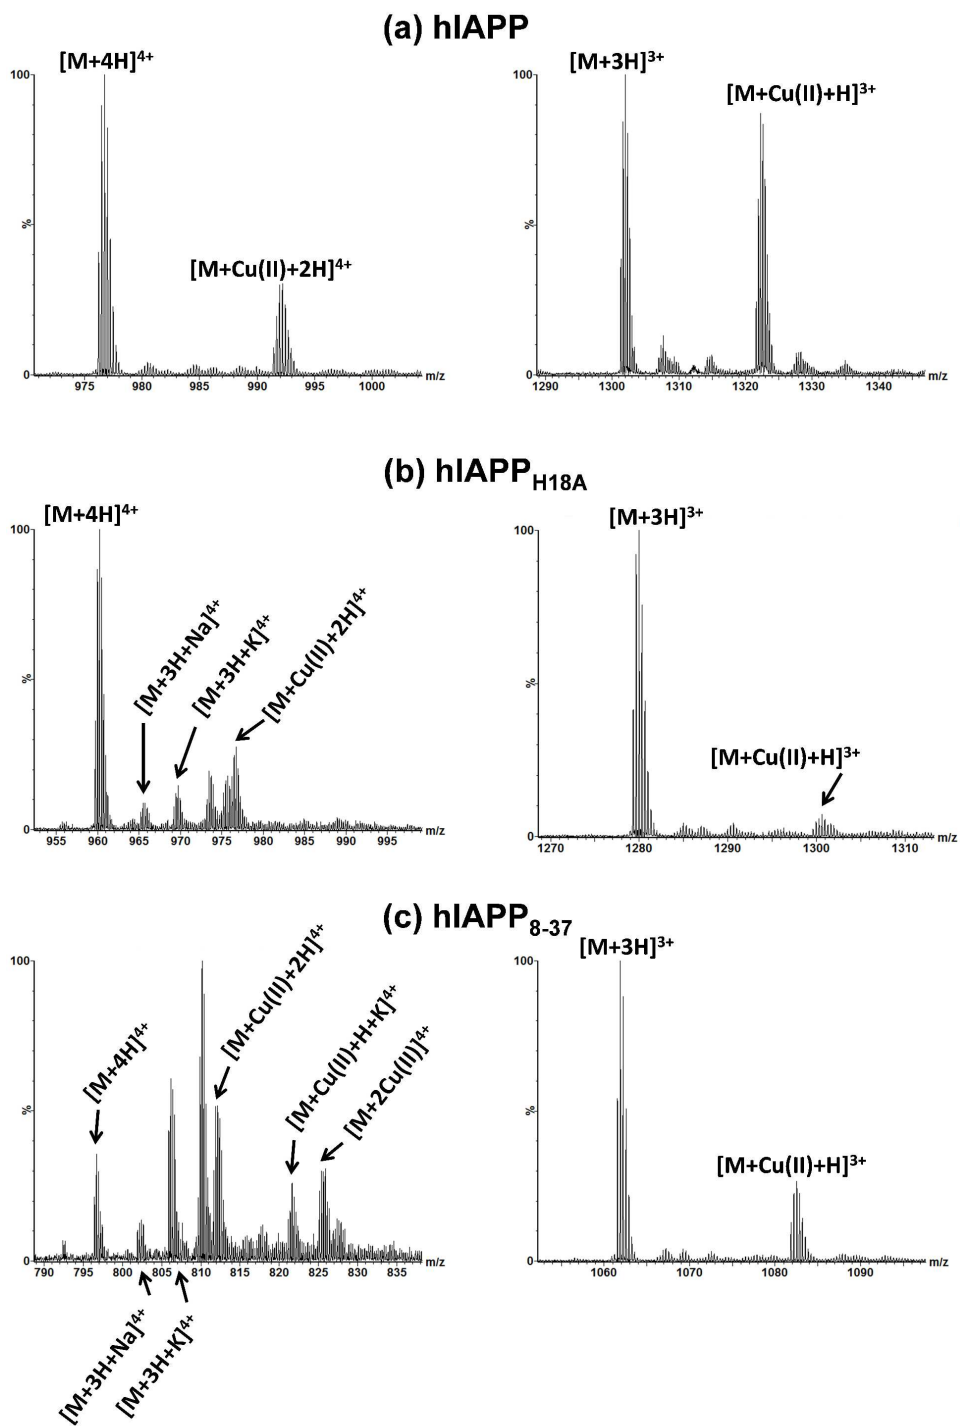

**Figure S3.** Quadruply and triply charged molecular and quasi-molecular ions in LAESI mass spectra from (a) hIAPP, (b) hIAPP<sub>H18A</sub>, and (c) hIAPP<sub>8-37</sub> solutions in the presence of Cu<sup>2+</sup>.

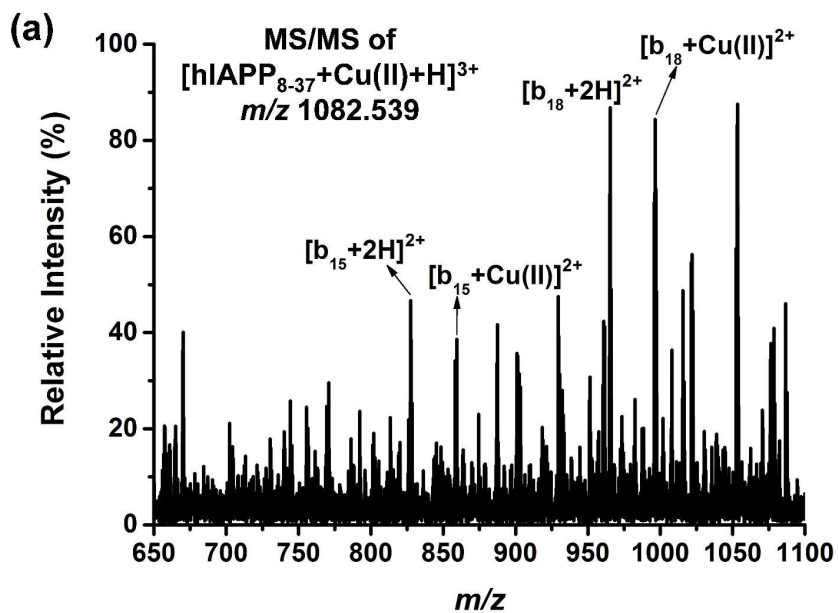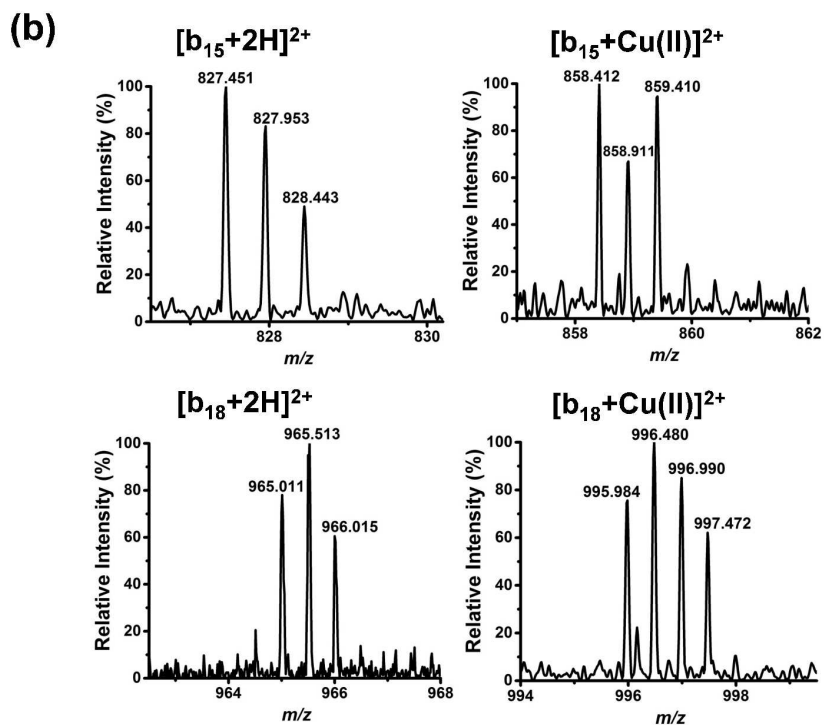

**Figure S4.** (a) Tandem mass spectrum of  $[\text{hIAPP}_{8-37}+\text{Cu(II)}+\text{H}]^{3+}$  at  $m/z$  1082.5 shows a Cu(II) adduct for fragments  $\text{b}_{18}$  and possibly  $\text{b}_{15}$ . (b) Isotope distribution patterns of fragment ions  $[\text{b}_{15}+2\text{H}]^{2+}$ ,  $[\text{b}_{15}+\text{Cu(II)}]^{2+}$ ,  $[\text{b}_{18}+2\text{H}]^{2+}$ , and  $[\text{b}_{18}+\text{Cu(II)}]^{2+}$ .

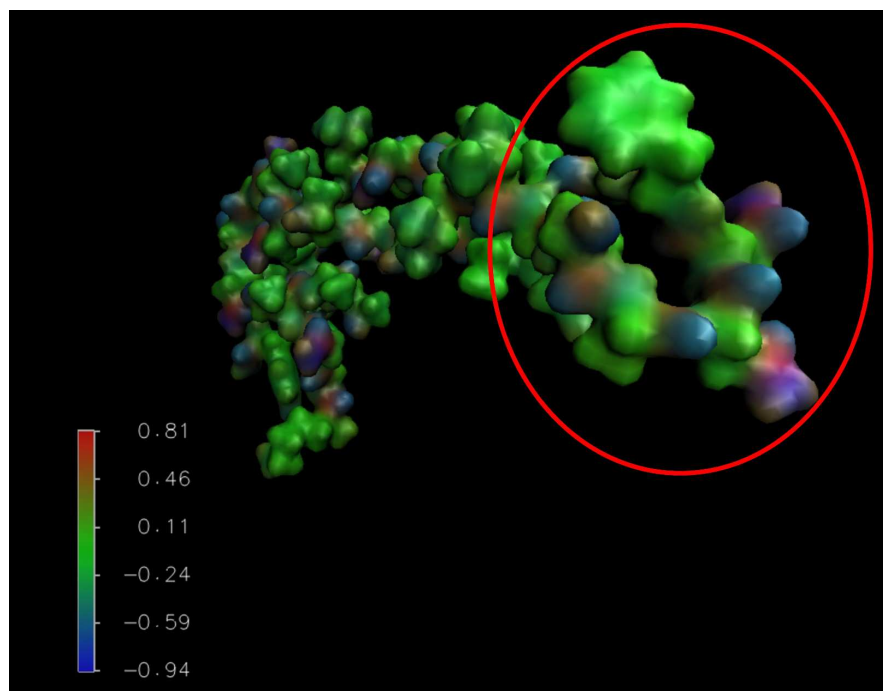

**Figure S5.** Simulated  $\beta$ -hairpin structure of the triply charged hIAPP is color coded by the partial charges on each atom. The red circle highlights the -HSSNN- residues at the loop of the  $\beta$ -hairpin, forming a negatively charged pocket that offers a potential coordination site for the Cu(II) ions.<sup>1</sup> The simulated structure of the amylin ion was kindly provided by Professor Michael T. Bowers of the Department of Chemistry and Biochemistry at the University of California, Santa Barbara.

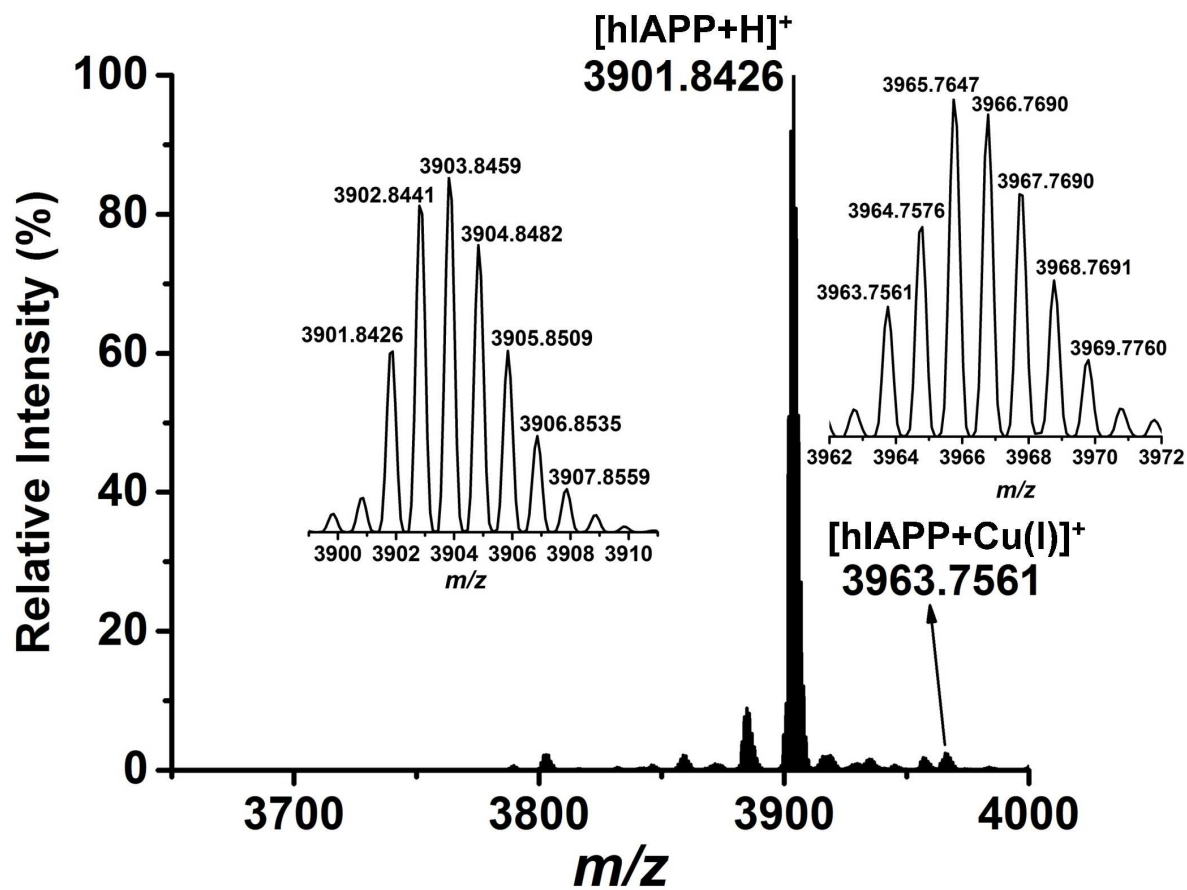

**Figure S6.** Mass spectrum of human amylin incubated with copper(II) obtained by MALDI-MS. The copper adduct peak shows that the Cu (II) is reduced to Cu(I), in agreement with a previous study.<sup>2</sup>

**Table S1.** Comparison of measured and calculated  $m/z$  and isotope distributions for (a) quadruply and (b) triply charged hIAPP-Cu adducts. The ions are distinguished based on the copper isotopes,  $^{63}\text{Cu}$  and  $^{65}\text{Cu}$ , carbon isotopes,  $^{12}\text{C}$  and  $^{13}\text{C}$ , and charge states, Cu(I) and Cu(II).

(a) 4+ hIAPP

|     | Measured hIAPP-Cu |                        | Calculated hIAPP-Cu(I)                                                                            |                    |                        |       | Calculated hIAPP-Cu(II)                                                                            |                        |     |      |
|-----|-------------------|------------------------|---------------------------------------------------------------------------------------------------|--------------------|------------------------|-------|----------------------------------------------------------------------------------------------------|------------------------|-----|------|
|     | $m/z$             | Relative intensity (%) | $m/z$                                                                                             | $\Delta m/z$ (mDa) | Relative intensity (%) | $m/z$ | $\Delta m/z$ (mDa)                                                                                 | Relative intensity (%) |     |      |
| M   | 991.459           | 35.3                   | $^{12}\text{C}_{165}\text{H}_{264}\text{N}_{51}\text{O}_{55}\text{S}_2\text{Cu(I)}$               | 991.707            | -248                   | 36.4  | $^{12}\text{C}_{165}\text{H}_{263}\text{N}_{51}\text{O}_{55}\text{S}_2\text{Cu(II)}$               | 991.455                | -4  | 36.4 |
| M+1 | 991.706           | 72.2                   | $^{12}\text{C}_{164}\text{C}^{13}\text{H}_{264}\text{N}_{51}\text{O}_{55}\text{S}_2\text{Cu(I)}$  | 991.957            | -251                   | 74.7  | $^{12}\text{C}_{165}\text{C}^{13}\text{H}_{263}\text{N}_{51}\text{O}_{55}\text{S}_2\text{Cu(II)}$  | 991.705                | -1  | 74.7 |
| M+2 | 991.954           | 97.9                   | $^{12}\text{C}_{163}\text{C}_2\text{H}_{264}\text{N}_{51}\text{O}_{55}\text{S}_2\text{Cu(I)}$ and | 992.207            | -253                   | 99.8  | $^{12}\text{C}_{163}\text{C}_2\text{H}_{263}\text{N}_{51}\text{O}_{55}\text{S}_2\text{Cu(II)}$ and | 991.955                | 1   | 99.8 |
|     |                   |                        | $^{12}\text{C}_{165}\text{H}_{264}\text{N}_{51}\text{O}_{55}\text{S}_2\text{Cu(I)}$               | 992.198            | -244                   |       | $^{12}\text{C}_{165}\text{H}_{263}\text{N}_{51}\text{O}_{55}\text{S}_2\text{Cu(II)}$               | 991.946                | -8  |      |
| M+3 | 992.201           | 100.0                  | $^{12}\text{C}_{162}\text{C}_3\text{H}_{264}\text{N}_{51}\text{O}_{55}\text{S}_2\text{Cu(I)}$ and | 992.457            | -256                   | 100   | $^{12}\text{C}_{162}\text{C}_3\text{H}_{263}\text{N}_{51}\text{O}_{55}\text{S}_2\text{Cu(II)}$ and | 992.205                | 4   | 100  |
|     |                   |                        | $^{12}\text{C}_{164}\text{C}^{13}\text{H}_{264}\text{N}_{51}\text{O}_{55}\text{S}_2\text{Cu(I)}$  | 992.448            | -247                   |       | $^{12}\text{C}_{164}\text{C}^{13}\text{H}_{263}\text{N}_{51}\text{O}_{55}\text{S}_2\text{Cu(II)}$  | 992.196                | -5  |      |
| M+4 | 992.463           | 80.1                   | $^{12}\text{C}_{161}\text{C}_4\text{H}_{264}\text{N}_{51}\text{O}_{55}\text{S}_2\text{Cu(I)}$ and | 992.707            | -244                   | 79.4  | $^{12}\text{C}_{161}\text{C}_4\text{H}_{263}\text{N}_{51}\text{O}_{55}\text{S}_2\text{Cu(II)}$ and | 992.455                | -8  | 79.4 |
|     |                   |                        | $^{12}\text{C}_{163}\text{C}_2\text{H}_{264}\text{N}_{51}\text{O}_{55}\text{S}_2\text{Cu(I)}$     | 992.698            | -235                   |       | $^{12}\text{C}_{163}\text{C}_2\text{H}_{263}\text{N}_{51}\text{O}_{55}\text{S}_2\text{Cu(II)}$     | 992.446                | -17 |      |
| M+5 | 992.710           | 50.6                   | $^{12}\text{C}_{160}\text{C}_5\text{H}_{264}\text{N}_{51}\text{O}_{55}\text{S}_2\text{Cu(I)}$ and | 992.957            | -247                   | 52    | $^{12}\text{C}_{160}\text{C}_5\text{H}_{263}\text{N}_{51}\text{O}_{55}\text{S}_2\text{Cu(II)}$ and | 992.705                | -5  | 52   |
|     |                   |                        | $^{12}\text{C}_{162}\text{C}_3\text{H}_{264}\text{N}_{51}\text{O}_{55}\text{S}_2\text{Cu(I)}$     | 992.948            | -238                   |       | $^{12}\text{C}_{162}\text{C}_3\text{H}_{263}\text{N}_{51}\text{O}_{55}\text{S}_2\text{Cu(II)}$     | 992.696                | -14 |      |
| M+6 | 992.958           | 27.2                   | $^{12}\text{C}_{159}\text{C}_6\text{H}_{264}\text{N}_{51}\text{O}_{55}\text{S}_2\text{Cu(I)}$ and | 993.207            | -249                   | 29    | $^{12}\text{C}_{159}\text{C}_6\text{H}_{263}\text{N}_{51}\text{O}_{55}\text{S}_2\text{Cu(II)}$ and | 992.955                | -3  | 29   |
|     |                   |                        | $^{12}\text{C}_{161}\text{C}_4\text{H}_{264}\text{N}_{51}\text{O}_{55}\text{S}_2\text{Cu(I)}$     | 993.198            | -240                   |       | $^{12}\text{C}_{161}\text{C}_4\text{H}_{263}\text{N}_{51}\text{O}_{55}\text{S}_2\text{Cu(II)}$     | 992.946                | -12 |      |
| M+7 | 993.205           | 10.6                   | $^{12}\text{C}_{158}\text{C}_7\text{H}_{264}\text{N}_{51}\text{O}_{55}\text{S}_2\text{Cu(I)}$ and | 993.457            | -252                   | 14.1  | $^{12}\text{C}_{158}\text{C}_7\text{H}_{263}\text{N}_{51}\text{O}_{55}\text{S}_2\text{Cu(II)}$ and | 993.205                | 0   | 14.1 |
|     |                   |                        | $^{12}\text{C}_{160}\text{C}_5\text{H}_{264}\text{N}_{51}\text{O}_{55}\text{S}_2\text{Cu(I)}$     | 993.448            | -243                   |       | $^{12}\text{C}_{160}\text{C}_5\text{H}_{263}\text{N}_{51}\text{O}_{55}\text{S}_2\text{Cu(II)}$     | 993.196                | -9  |      |



## (b) 4+ hIAPP

|            | Measured hIAPP-Cu |                        | Calculated hIAPP-Cu(I)                                                                                  |            |                    |                        | Calculated hIAPP-Cu(II)                                                                           |            |                    |                        |
|------------|-------------------|------------------------|---------------------------------------------------------------------------------------------------------|------------|--------------------|------------------------|---------------------------------------------------------------------------------------------------|------------|--------------------|------------------------|
|            | <i>m/z</i>        | Relative intensity (%) |                                                                                                         | <i>m/z</i> | $\Delta m/z$ (mDa) | Relative intensity (%) |                                                                                                   | <i>m/z</i> | $\Delta m/z$ (mDa) | Relative intensity (%) |
| <b>M</b>   | 1321.596          | 43.6                   | $^{12}\text{C}_{165}\text{H}_{263}\text{N}_{51}\text{O}_{55}\text{S}_2\text{Cu(I)}$                     | 1321.940   | -344               | 36.4                   | $^{12}\text{C}_{165}\text{H}_{262}\text{N}_{51}\text{O}_{55}\text{S}_2\text{Cu(II)}$              | 1321.604   | 8                  | 36.5                   |
| <b>M+1</b> | 1321.929          | 76.7                   | $^{12}\text{C}_{164}\text{C}^{13}\text{H}_{263}\text{N}_{51}\text{O}_{55}\text{S}_2\text{Cu(I)}$        | 1322.273   | -344               | 74.7                   | $^{12}\text{C}_{165}\text{C}^{13}\text{H}_{262}\text{N}_{51}\text{O}_{55}\text{S}_2\text{Cu(II)}$ | 1321.937   | 8                  | 74.7                   |
| <b>M+2</b> | 1322.262          | 100.0                  | $^{12}\text{C}_{163}\text{C}_2\text{H}_{263}\text{N}_{51}\text{O}_{55}\text{S}_2\text{Cu(I)}$           | 1322.606   | -344               | 99.8                   | $^{12}\text{C}_{163}\text{C}_2\text{H}_{262}\text{N}_{51}\text{O}_{55}\text{S}_2\text{Cu(II)}$    | 1322.270   | 8                  | 99.8                   |
|            |                   |                        | and<br>$^{12}\text{C}_{165}\text{H}_{263}\text{N}_{51}\text{O}_{55}\text{S}_2\text{Cu(I)}$              | 1322.598   | -336               |                        | $^{12}\text{C}_{165}\text{H}_{262}\text{N}_{51}\text{O}_{55}\text{S}_2\text{Cu(II)}$              | 1322.261   | -1                 |                        |
| <b>M+3</b> | 1322.596          | 96.9                   | $^{12}\text{C}_{162}\text{C}_3\text{H}_{263}\text{N}_{51}\text{O}_{55}\text{S}_2\text{Cu(I)}$           | 1322.940   | -344               | 100.0                  | $^{12}\text{C}_{162}\text{C}_3\text{H}_{262}\text{N}_{51}\text{O}_{55}\text{S}_2\text{Cu(II)}$    | 1322.604   | 8                  | 100.0                  |
|            |                   |                        | and<br>$^{12}\text{C}_{164}\text{C}^{13}\text{H}_{263}\text{N}_{51}\text{O}_{55}\text{S}_2\text{Cu(I)}$ | 1322.931   | -335               |                        | $^{12}\text{C}_{164}\text{C}^{13}\text{H}_{262}\text{N}_{51}\text{O}_{55}\text{S}_2\text{Cu(II)}$ | 1322.595   | -1                 |                        |
| <b>M+4</b> | 1322.929          | 79.3                   | $^{12}\text{C}_{161}\text{C}_4\text{H}_{263}\text{N}_{51}\text{O}_{55}\text{S}_2\text{Cu(I)}$           | 1323.273   | -344               | 79.4                   | $^{12}\text{C}_{161}\text{C}_4\text{H}_{262}\text{N}_{51}\text{O}_{55}\text{S}_2\text{Cu(II)}$    | 1322.937   | 8                  | 79.4                   |
|            |                   |                        | and<br>$^{12}\text{C}_{163}\text{C}_2\text{H}_{263}\text{N}_{51}\text{O}_{55}\text{S}_2\text{Cu(I)}$    | 1323.264   | -335               |                        | $^{12}\text{C}_{163}\text{C}_2\text{H}_{262}\text{N}_{51}\text{O}_{55}\text{S}_2\text{Cu(II)}$    | 1322.928   | -1                 |                        |
| <b>M+5</b> | 1323.263          | 49.1                   | $^{12}\text{C}_{160}\text{C}_5\text{H}_{263}\text{N}_{51}\text{O}_{55}\text{S}_2\text{Cu(I)}$           | 1323.606   | -343               | 52.0                   | $^{12}\text{C}_{160}\text{C}_5\text{H}_{262}\text{N}_{51}\text{O}_{55}\text{S}_2\text{Cu(II)}$    | 1323.270   | 7                  | 52.0                   |
|            |                   |                        | and<br>$^{12}\text{C}_{162}\text{C}_3\text{H}_{263}\text{N}_{51}\text{O}_{55}\text{S}_2\text{Cu(I)}$    | 1323.598   | -335               |                        | $^{12}\text{C}_{162}\text{C}_3\text{H}_{262}\text{N}_{51}\text{O}_{55}\text{S}_2\text{Cu(II)}$    | 1323.261   | -2                 |                        |
| <b>M+6</b> | 1323.596          | 25.6                   | $^{12}\text{C}_{159}\text{C}_6\text{H}_{263}\text{N}_{51}\text{O}_{55}\text{S}_2\text{Cu(I)}$           | 1323.940   | -344               | 29.0                   | $^{12}\text{C}_{159}\text{C}_6\text{H}_{262}\text{N}_{51}\text{O}_{55}\text{S}_2\text{Cu(II)}$    | 1323.604   | 8                  | 29.0                   |
|            |                   |                        | and<br>$^{12}\text{C}_{161}\text{C}_4\text{H}_{263}\text{N}_{51}\text{O}_{55}\text{S}_2\text{Cu(I)}$    | 1323.931   | -335               |                        | $^{12}\text{C}_{161}\text{C}_4\text{H}_{262}\text{N}_{51}\text{O}_{55}\text{S}_2\text{Cu(II)}$    | 1323.595   | -1                 |                        |
| <b>M+7</b> | 1323.930          | 11.3                   | $^{12}\text{C}_{158}\text{C}_7\text{H}_{263}\text{N}_{51}\text{O}_{55}\text{S}_2\text{Cu(I)}$           | 1324.273   | -343               | 14.1                   | $^{12}\text{C}_{158}\text{C}_7\text{H}_{262}\text{N}_{51}\text{O}_{55}\text{S}_2\text{Cu(II)}$    | 1323.937   | 7                  | 14.1                   |
|            |                   |                        | and<br>$^{12}\text{C}_{160}\text{C}_5\text{H}_{263}\text{N}_{51}\text{O}_{55}\text{S}_2\text{Cu(I)}$    | 1324.264   | -334               |                        | $^{12}\text{C}_{160}\text{C}_5\text{H}_{262}\text{N}_{51}\text{O}_{55}\text{S}_2\text{Cu(II)}$    | 1323.928   | -2                 |                        |

**Table S2.** Measured 5+ hIAPP dimer collision cross sections ( $CCS_{\text{meas}}$ ) are compared to the dimer  $CCS_{\text{est}}$  estimated from the  $CCS_{\text{meas}}$  of 4+ hIAPP monomers using the isotropic selfassembly model (see text).

|                    | <b>(4+) Monomer<br/><math>CCS_{\text{meas}}</math> (<math>\text{\AA}^2</math>)</b> | <b>(5+) Dimer<br/><math>CCS_{\text{meas}}</math> (<math>\text{\AA}^2</math>)</b> | <b>Dimer<br/><math>CCS_{\text{est}}</math> (<math>\text{\AA}^2</math>)</b> | <b><math>\Delta</math> Dimer CCS<br/>(%)</b> |
|--------------------|------------------------------------------------------------------------------------|----------------------------------------------------------------------------------|----------------------------------------------------------------------------|----------------------------------------------|
| <b>Conformer 1</b> | 594.2                                                                              | Not detected                                                                     | 943.2                                                                      | N/A                                          |
| <b>Conformer 2</b> | 683.8                                                                              | Not detected                                                                     | 1085.5                                                                     | N/A                                          |
| <b>Conformer 3</b> | 747.8                                                                              | 1139.6                                                                           | 1187.1                                                                     | 4.0                                          |

## REFERENCES

- (1) Dupuis, N. F.; Wu, C.; Shea, J. E.; Bowers, M. T. *J. Am. Chem. Soc.* 2009, *131*, 18283-18292.
- (2) Zhang, J.; Frankevich, V.; Knochenmuss, R.; Friess, S. D.; Zenobi, R. *J. Am. Soc. Mass Spectrom.* 2003, *14*, 42-50.
